# Supplementary material for: Evolution and Expression Divergence of the CYP78A Subfamily Genes in Soybean
Source: PubMed Central journal article supplement (PMC6316016; doi:10.3390/genes9120611), 2018-12-07
Supplement: genes-09-00611-s001.pdf [file genes-09-00611-s001.pdf]

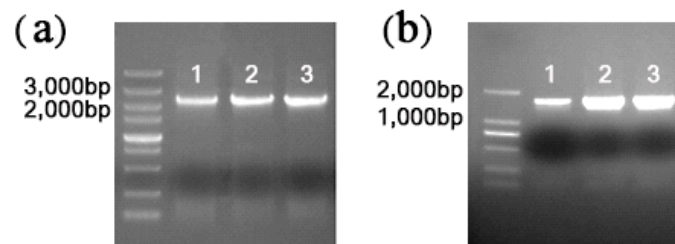

**Figure S1.** Isolation of the *GmCYP78As* from soybean. **(a)** PCR amplification of the genomic regions of *GmCYP78As* in wild-type Williams82. Lanes 1 to 3 represent *GmCYP78A70*, *GmCYP78A57* and *GmCYP78A72*, respectively, amplified by OL4100, OL0330, OL0388. **(b)** PCR-amplification of the CDS regions of *GmCYP78As* in wild-type Williams82 cDNA. Lanes 1 to 3 represent *GmCYP78A70*, *GmCYP78A57*, *GmCYP78A72*, respectively, and amplified by OL5684, OL5686 and OL5688.

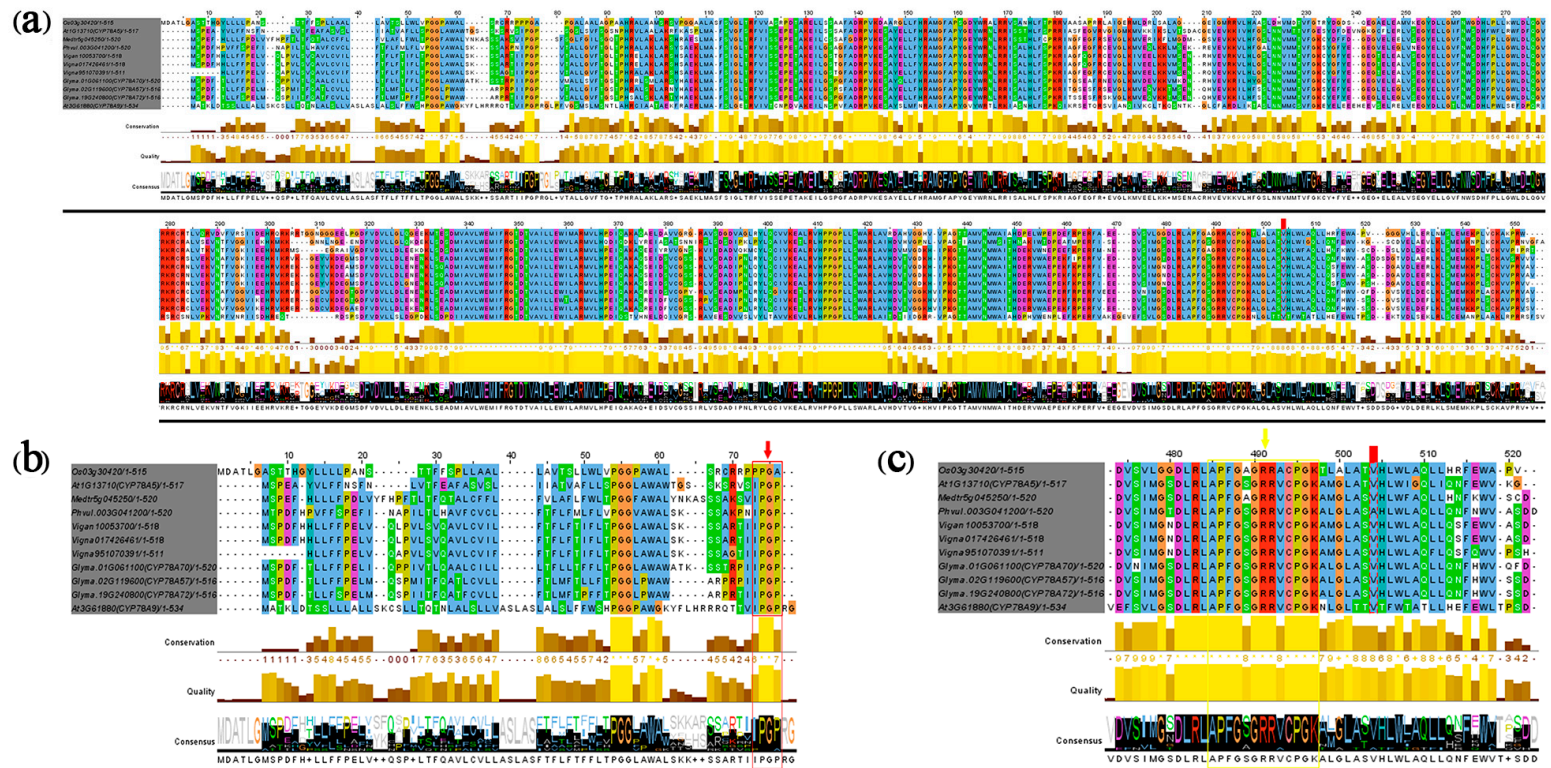

**Figure S2.** Conserved sites in the CYP78As from soybean, Arabidopsis, rice, *Medicago truncatula*, *Vigna angularis* and *Phaseolus vulgaris*. (a) Conserved sites in the CYP78As. (b) Hydrophobic helix structure in their N-terminal region (red arrow). (c) Heme-binding motif in their C-terminal region (purple arrow).

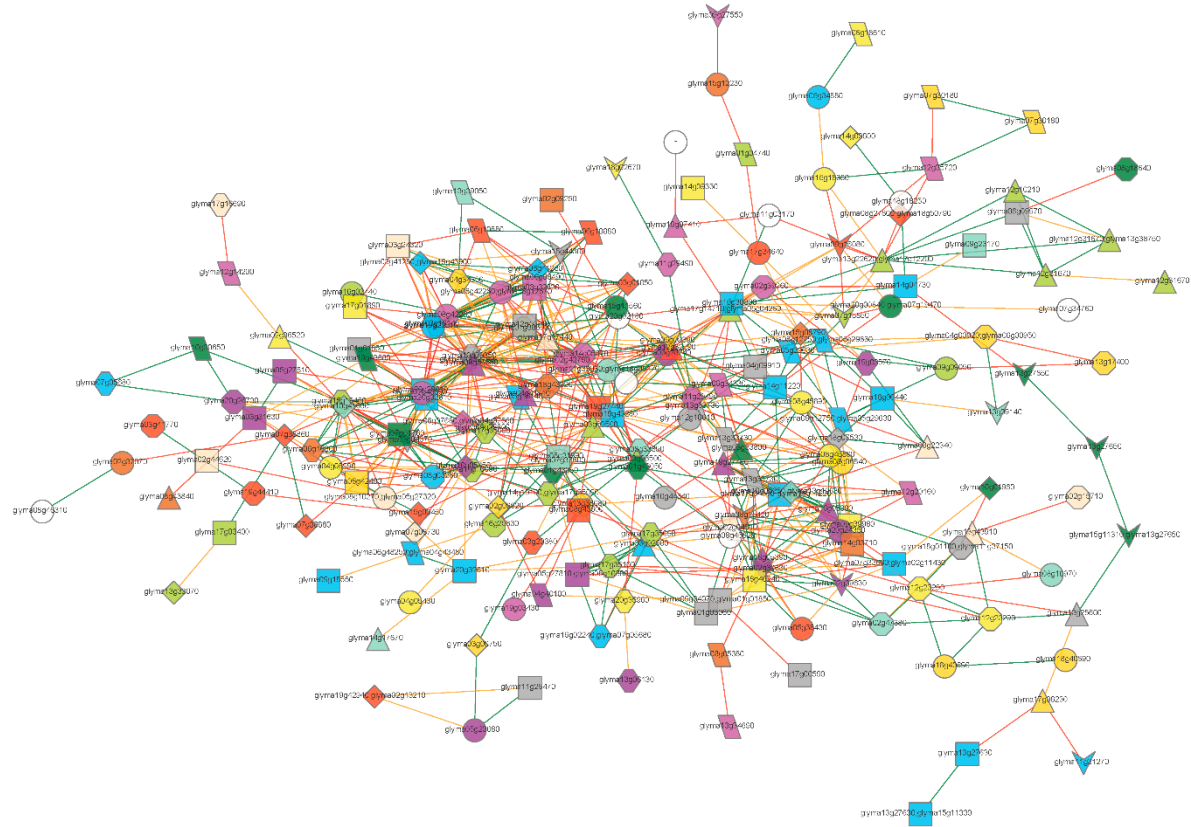

Figure S3. Co-expression networks of *GmCYP78A57* and *GmCYP78A72*.

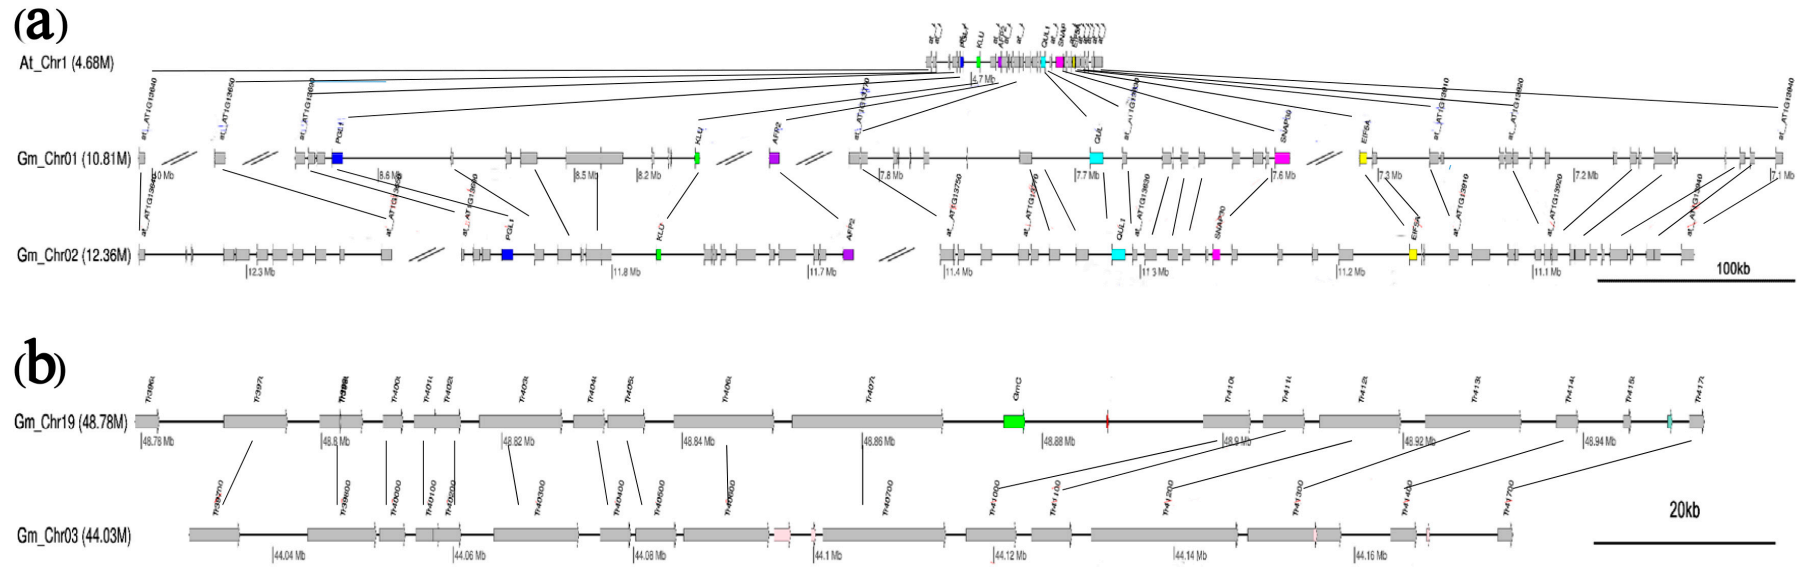

**Figure S4.** Synteny plots of soybean and Arabidopsis sequence assemblies surrounding the *AtKLU* and *GmCYP78A72* genes. **(a)** Synteny plot of the soybean and Arabidopsis sequence assemblies surrounding the *AtKLU*. **(b)** Synteny plot of the soybean sequence assemblies surrounding *GmCYP78A72*. The color key for specific genes is as follows: *PGL1* (6-phosphogluconolactonase 1, At1G13700) – blue; *KLU* (Cytochrome P450, At1G13710) – green; *AFP2* (ABI five binding protein 2, At1G13740) – purple; *QUL1* (QUASIMODO2 LIKE 1, At1G13820) – magenta; *ANAP30* (Soluble N-ethylmaleimide-sensitive factor adaptor protein 30, At1G13860) – pink; *EIF5A* (Eukaryotic elongation factor 5A-1, At1G13890) – yellow. The syntenic matching genes in *Glycine max* were also likewise colored. Change name: “gm\_Glyma.19G2” to “Tr”.

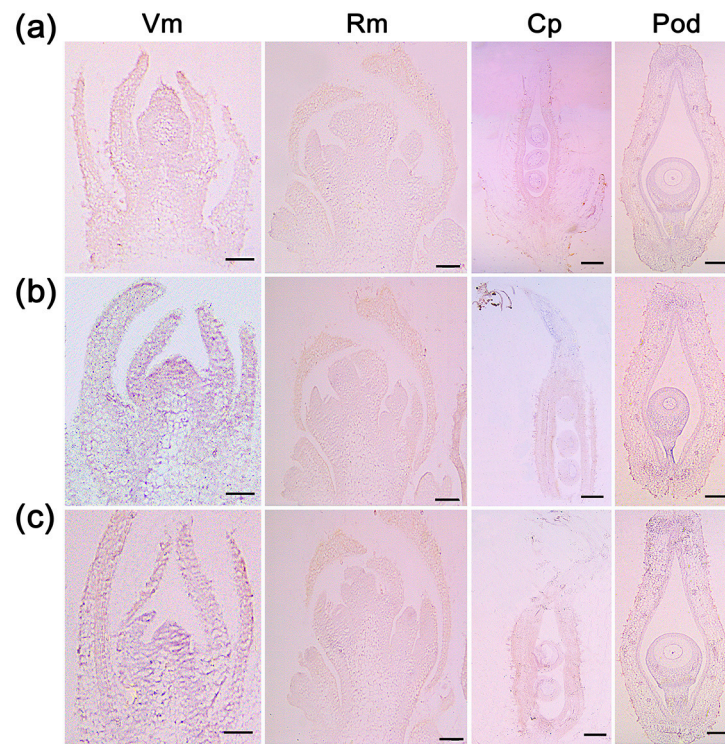

**Figure S5.** Sense control of the *in situ* hybridization for *GmCYP78As*. **(a-c)** Sense control of *GmCYP78A70*, *GmCYP78A57* and *GmCYP78A72* in vegetative meristem (Vm), reproductive meristem (Rm), and carpel (Cp) and young pod, respectively. Scale bars = 100  $\mu$ m in (a-c).



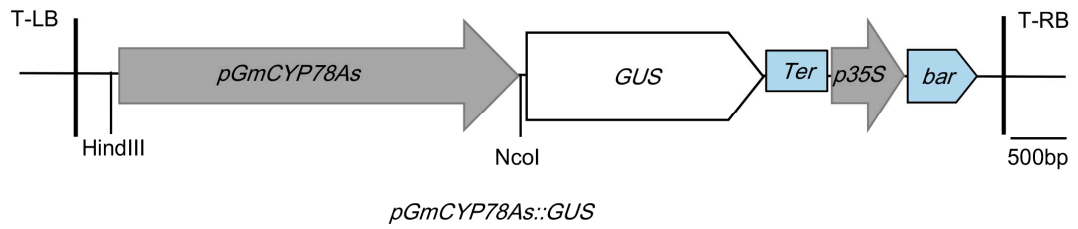

**Figure S6.** Diagrams illustrating the constructs used for transformation. *pGmCYP78As::GUS*, contains the 3kb promoter regions of the *GmCYP78As* and *GUS* reporter.

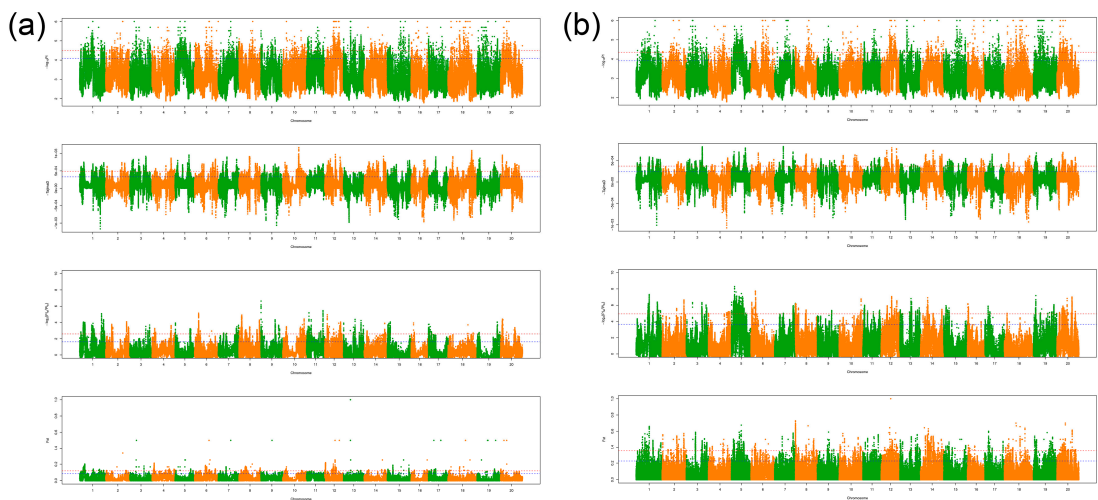

**Figure S7.** Selective pressure analysis across the whole genome. (a) Selective pressure between *Glycine soja* and landrace. (b) Selective pressure between landrace and the improved cultivar. Density of polymorphism ( $-\log_{10}P_i$ ), selection statistics ( $-Tajima's D$ ), diversity between two populations ( $-\log_2 P_{i_a}/P_{i_b}$  and  $F_{st}$ ), and genome annotation are shown (from top to bottom). Top 1% and 5% thresholds are shown in red and blue dotted lines, respectively.

**Table S1.** Primers used in this study.

| Primers | Illustration      | Locus           | Forward sequence 5'→3'<br>Reverse sequence 5'→3'                 |
|---------|-------------------|-----------------|------------------------------------------------------------------|
| OL4100  | GmCYP78A70        | Glyma.01G061100 | AGTTCCAGCACAAATAACCTCTTCATC<br>GCAACAGCAACCCTAGGCA               |
| OL5684  | GmCYP78A70<br>CDS | Glyma.01G061100 | ATGTCACCAGATTTTACACTCTTGTT<br>GCAACAGCAACCCTAGGCA                |
| OL0330  | GmCYP78A57        | Glyma.02G119600 | GCACAACAAGCTCTTCATTTCTCC<br>ACGACCCACACAAAACAAAACCTC             |
| OL5686  | GmCYP78A57<br>CDS | Glyma.02G119600 | ATGTCACCAGATTTTACACTTTTGT<br>GCAACAGAAACCCTAGGCACA               |
| OL0388  | GmCYP78A72        | Glyma.19G240800 | TTCAGCACACCGAATTCATCTCTCC<br>ACCACCTCCC GAATTCAACACACAT          |
| OL5688  | GmCYP78A72<br>CDS | Glyma.19G240800 | ATGTCACCAGATTTTACACTCTTGTT<br>GCAAACAGAAACCCTAGGCAC              |
| OL5209  | Probe             | Glyma.01G061100 | TTAGATGACCTTTTTATTAAAATCTAATAC<br>CTATAACATCAAATATATAAAGGTAGGAAG |
| OL5211  | Probe             | Glyma.02G119600 | GTTGTTCCCAAGGCTGTGCC<br>ATTAAACAACATAGAACGGCATGATC               |
| OL5213  | Probe             | Glyma.19G240800 | GTTCTTCGGTTGAGTTGGTTTG<br>TGCTGCAAATACACTTAATTAACAAC             |
| OL5822  | Promoter          | Glyma.01G061100 | TTGCATCACTTGTTACCCACACC<br>TTTTTGTTTTGTTTTGGTTTTTTTGTG           |
| OL5824  | Promoter          | Glyma.02G119600 | TGAGCTGAGGGTGAGATCACTGTT<br>TTTTGGTGAAAGAAAAGAAAGTGTGG           |
| OL5826  | Promoter          | Glyma.19G240800 | TTCATTAAACATCAGCGGTAATGTT<br>TTTTGGTAGTGTTGTTGCAAAGAA            |
| OL2187  | q RT-PCR          | Glyma.01G061100 | GAAGTTAAGAAGGTTATGAAGGATAACCG<br>CACCTCACCTCGTAGAACTCAT          |
| OL2816  | q RT-PCR          | Glyma.02G119600 | TCTCGTGGGCTCGCCTTGCT<br>CCGCTCGGGCCTAAACTTCT                     |
| OL1009  | q RT-PCR          | Glyma.19G240800 | GATGTTTTGCTTGATTGGAGAAGG<br>CTTTGCTTGGATTTCAGGGTGGAG             |

**Table S2.** Sizes of the genomic DNA sequences and the CDS.

| Gene              | Size of the genomic<br>DNA sequence (bp) | Size of the CDS (bp) |
|-------------------|------------------------------------------|----------------------|
| <i>GmCYP78A70</i> | 2341                                     | 1563                 |
| <i>GmCYP78A57</i> | 2425                                     | 1551                 |
| <i>GmCYP78A72</i> | 2350                                     | 1551                 |

**Table S3.** Ontology analysis of the genes in the cluster.

| ID         | Domain | Description                                   | Terms in network | Terms in background | Term enrichment p-value |
|------------|--------|-----------------------------------------------|------------------|---------------------|-------------------------|
| GO:0050794 | BP     | regulation of cellular process                | 15               | 2794                | 0.0                     |
| GO:0048522 | BP     | positive regulation of cellular process       | 2                | 222                 | 0.01                    |
| GO:0019222 | BP     | regulation of metabolic process               | 15               | 2120                | 0.0                     |
| GO:0060255 | BP     | regulation of macromolecule metabolic process | 14               | 1834                | 0.0                     |
| GO:0043086 | BP     | negative regulation of catalytic activity     | 2                | 198                 | 0.01                    |
| GO:0080090 | BP     | regulation of primary metabolic process       | 14               | 1881                | 0.0                     |
| GO:0006355 | BP     | regulation of transcription, DNA-templated    | 13               | 1537                | 0.0                     |
| GO:0006810 | BP     | transport                                     | 12               | 1912                | 0.0                     |
| GO:0044765 | BP     | single-organism transport                     | 11               | 1332                | 0.0                     |
| GO:0071702 | BP     | organic substance transport                   | 4                | 746                 | 0.0                     |
| GO:0030001 | BP     | metal ion transport                           | 2                | 277                 | 0.01                    |
| GO:0055085 | BP     | transmembrane transport                       | 6                | 690                 | 0.0                     |



**Table S4.** Ka/Ks analysis and estimate of the absolute dates between the duplicated *GmCYP78A* genes

| Gene pair                    | Ka     | Ks    | Ka/Ks  | Date (million years) | Purifying selection |
|------------------------------|--------|-------|--------|----------------------|---------------------|
| <i>GmCYP78A70/GmCYP78A57</i> | 0.0639 | 0.405 | 0.1579 | 13.49                | Yes                 |
| <i>GmCYP78A70/GmCYP78A72</i> | 0.0647 | 0.418 | 0.1549 | 13.92                | Yes                 |
| <i>GmCYP78A57/GmCYP78A72</i> | 0.0174 | 0.116 | 0.1496 | 3.87                 | Yes                 |

**Table S5.** Transcription factors that could bind to the *GmCYP78As* promoters.

| Promoters  | Transcription factors |         |        |        |        |        |        |             |           |        |        |
|------------|-----------------------|---------|--------|--------|--------|--------|--------|-------------|-----------|--------|--------|
| GmCYP78A70 | ABI3                  | ARR18   | BZR1   | DOF5.6 | ERF094 | ERF7   | MYB3   | PIF3        | TGA1      | WRKY23 | WRKY63 |
|            | AGL3                  | ATHB-12 | CDC5   | DOF5.7 | ERF096 | ERF8   | MYB4   | PIF4        | TGA2      | WRKY25 | WRKY75 |
|            | AHL12                 | ATHB-6  | CDF2   | DRE1C  | ERF098 | FUS3   | MYB46  | PIF5        | TGA5      | WRKY30 | WRKY8  |
|            | AIB                   | BEE2    | CDF3   | DREB1A | ERF105 | GATA12 | MYB55  | RAP2-10     | TGA7      | WRKY38 | SOD7   |
|            | ARF1                  | BHLH13  | CMTA2  | DREB1E | ERF11  | GATA15 | MYB59  | RAP2-3      | TRB2      | WRKY40 | DPA4   |
|            | ARF3                  | BHLH3   | CMTA3  | DREB2C | ERF112 | GATA8  | MYC2   | RAV1        | UNE10     | WRKY43 |        |
|            | ARF5                  | BHLH34  | CRF2   | ERF008 | ERF13  | HBI1   | MYC3   | 3-Sep       | WRKY12    | WRKY45 |        |
|            | ARF8                  | BIM1    | DOF1.8 | ERF018 | ERF1B  | KAN1   | MYC4   | SPT         | WRKY15    | WRKY48 |        |
|            | ARR1                  | BIM2    | DOF2.4 | ERF039 | ERF3   | LEC2   | NAC025 | TCP19       | WRKY18    | WRKY57 |        |
|            | ARR10                 | BIM3    | DOF2.5 | ERF043 | ERF4   | MYB111 | NAC058 | TCP2        | WRKY2     | WRKY60 |        |
|            | ARR14                 | bZIP68  | DOF5.3 | ERF069 | ERF6   | MYB24  | NAC92  | TCP20       | WRKY21    | WRKY62 |        |
| GmCYP78A57 | ABF2                  | ARF3    | ATHB-6 | CDF3   | ERF008 | ERF7   | MYB24  | NAC083      | SPL12     | WRKY12 | WRKY60 |
|            | ABI3                  | ARF5    | ATHB-7 | CMTA2  | ERF018 | GATA11 | MYB3   | NAC92       | T11I18.17 | WRKY15 | WRKY62 |
|            | AG                    | ARF8    | BEE2   | CMTA3  | ERF039 | GATA12 | MYB4   | NL9         | TCP15     | WRKY18 | WRKY63 |
|            | AGL1                  | ARR1    | BHLH13 | DOF1.8 | ERF043 | GATA15 | MYB46  | PI          | TCP19     | WRKY2  | WRKY75 |
|            | AGL15                 | ARR10   | BHLH3  | DOF2.4 | ERF069 | GATA8  | MYB55  | PIF3        | TCP2      | WRKY21 | WRKY8  |
|            | AGL27                 | ARR11   | BHLH34 | DOF2.5 | ERF094 | GATA9  | MYB59  | PIF4        | TCP20     | WRKY23 | ZAP1   |
|            | AGL3                  | ARR14   | BIM1   | DOF5.3 | ERF096 | GT-1   | MYC2   | PIF5        | TCP23     | WRKY25 |        |
|            | AHL12                 | ARR18   | BIM2   | DOF5.6 | ERF098 | HAT1   | MYC3   | RAP2-3      | TCP4      | WRKY30 |        |
|            | AHL20                 | ARR2    | BIM3   | DOF5.7 | ERF105 | HAT5   | MYC4   | RAV1        | TGA1      | WRKY38 |        |
|            | AHL25                 | ATHB-12 | BZIP60 | DRE1C  | ERF11  | HBI1   | NAC025 | RAV1(var.2) | TGA2      | WRKY40 |        |
|            | AIB                   | ATHB-15 | bZIP68 | DREB1A | ERF112 | KAN1   | NAC043 | 1-Sep       | TGA5      | WRKY43 |        |
|            | AP1                   | ATHB-16 | BZR2   | DREB1E | ERF13  | KAN4   | NAC055 | 3-Sep       | TGA7      | WRKY45 |        |
|            | AP3                   | ATHB-5  | CCA1   | DREB2C | ERF1B  | LEC2   | NAC058 | SMZ         | TRB2      | WRKY48 |        |
|            | ARF1                  | ATHB-51 | CDF2   | EDT1   | ERF3   | MYB111 | NAC080 | SOC1        | UNE10     | WRKY57 |        |
| GmCYP78A72 | ABF2                  | ARF3    | BEE2   | CRF2   | ERF043 | FHY3   | MYB111 | NAC92       | SPL3      | TGA2   | WRKY48 |
|            | ABF3                  | ARF5    | BHLH13 | CRF4   | ERF069 | FLC    | MYB24  | NL9         | SPL4      | TGA5   | WRKY57 |

|       |         |        |        |        |        |        |             |           |        |        |
|-------|---------|--------|--------|--------|--------|--------|-------------|-----------|--------|--------|
| ABI3  | ARF8    | BHLH3  | DOF1.8 | ERF094 | FUS3   | MYB3   | PI          | SPL5      | TGA7   | WRKY60 |
| ABI5  | ARR1    | BHLH34 | DOF2.4 | ERF096 | GATA10 | MYB4   | PIF1        | SPL7      | TRB2   | WRKY62 |
| AG    | ARR10   | BIM1   | DOF2.5 | ERF098 | GATA11 | MYB46  | PIF3        | SPL8      | WRKY12 | WRKY63 |
| AGL1  | ARR11   | BIM2   | DOF5.3 | ERF105 | GATA12 | MYB55  | PIF4        | SPT       | WRKY15 | WRKY75 |
| AGL15 | ARR14   | BIM3   | DOF5.6 | ERF109 | GATA15 | MYB59  | PIF5        | SVP       | WRKY18 | WRKY8  |
| AGL27 | ARR18   | BZIP60 | DOF5.7 | ERF11  | GATA8  | MYC2   | RAP2-10     | T11I18.17 | WRKY2  |        |
| AGL3  | ARR2    | bZIP68 | DRE1C  | ERF112 | GATA9  | MYC3   | RAP2-3      | TCP15     | WRKY21 |        |
| AHL12 | ATHB-12 | BZR2   | DREB1A | ERF13  | GT-1   | MYC4   | RAV1        | TCP16     | WRKY23 |        |
| AHL20 | ATHB-15 | CCA1   | DREB1E | ERF1B  | HAT1   | NAC025 | RAV1(var.2) | TCP19     | WRKY25 |        |
| AHL25 | ATHB-16 | CDC5   | DREB2C | ERF3   | HAT5   | NAC043 | RAX3        | TCP2      | WRKY30 |        |
| AIB   | ATHB-5  | CDF2   | EDT1   | ERF4   | KAN1   | NAC055 | 1-Sep       | TCP20     | WRKY38 |        |
| AP1   | ATHB-51 | CDF3   | ERF008 | ERF6   | KAN4   | NAC058 | 3-Sep       | TCP23     | WRKY40 |        |
| AP3   | ATHB-6  | CMTA2  | ERF018 | ERF7   | LEC2   | NAC080 | SOC1        | TCP5      | WRKY43 |        |
| ARF1  | ATHB-7  | CMTA3  | ERF039 | ERF8   | LFY    | NAC083 | SPL12       | TGA1      | WRKY45 |        |

**Table S6.** Genotyping of the *GmCYP78A70* promoters in 30 soybean cultivars.

| Genotype             | Cultivar       | Expression level | Trifoliolate leaflets area (cm <sup>2</sup> ) |
|----------------------|----------------|------------------|-----------------------------------------------|
| 1 ATGAATGGTACCGAATAC | Zhongzuo9228   | 0.017148018      | 311.238                                       |
|                      | Heinong21      | 0.021345746      | 325.245                                       |
|                      | Jinong12       | 0.029241102      | 295.355                                       |
|                      | Bainong3       | 0.032509454      | 261.359                                       |
|                      | Jinong13       | 0.038445355      | 342.517                                       |
|                      | Jiunong29      | 0.041684412      | 394.739                                       |
| 2 GCGGATGGTACCGAATGC | Changnong8     | 0.020873849      | 273.453                                       |
|                      | Longxuan09-502 | 0.017274163      | 362.752                                       |
|                      | Changnong10    | 0.022676184      | 303.656                                       |
| 3 GTAGGCATCACTAAACGT | Jiunong22      | 0.007552905      | 137.536                                       |
|                      | Hefeng25       | 0.002059006      | 159.186                                       |
|                      | Heinong51      | 0.008924049      | 167.962                                       |
|                      | Dongnong52     | 0.002059006      | 169.578                                       |
|                      | Jilinxiaoli4   | 0.010434132      | 185.569                                       |
|                      | Lingyin2       | 0.00208007       | 189.631                                       |
|                      | Jiunong28      | 0.000890042      | 191.009                                       |
|                      | Changnong10    | 0.020333357      | 195.265                                       |
|                      | Sinong2        | 0.004232378      | 197.567                                       |
|                      | Jiyu65         | 0.003738433      | 207.638                                       |
|                      | Dongnong37     | 0.017060642      | 208.482                                       |
|                      | Dongnong35     | 0.011216663      | 215.768                                       |
|                      | Changnong14    | 0.005268748      | 219.586                                       |
|                      | Beidou5        | 0.021472223      | 222.563                                       |
|                      | Jilin44        | 0.013520427      | 232.892                                       |
|                      | Heinong17      | 0.0157792        | 245.079                                       |
|                      | Heinong4       | 0.013101578      | 276.752                                       |
| Chengdou6            | 0.027262392    | 283.593          |                                               |
| Changnong15          | 0.011813079    | 289.563          |                                               |
| Jinong11             | 0.043971908    | 323.162          |                                               |

**Table S7.** Genotyping of the *GmCYP78A57* promoters in 30 soybean cultivars.

| Genotype                                 | Cultivar     | Expression level | 100-seed weight (g) |
|------------------------------------------|--------------|------------------|---------------------|
| 4<br>AAAGACAGCGTACAGTG<br>GGTGGCCCCCGCGA | Jiyu89       | 1.174439381      | 16.8                |
|                                          | Henong59     | 0.996568408      | 17.5                |
|                                          | Jidadou1     | 1.497036067      | 19.2                |
|                                          | Heinong51    | 1.199157372      | 20                  |
|                                          | Jiyu47       | 0.91342184       | 20.3                |
|                                          | Hefeng25     | 1.221759058      | 21                  |
|                                          | Dongnong52   | 1.799513526      | 21.2                |
|                                          | Jiyu63       | 2.043627024      | 23                  |
|                                          | Jidadou2     | 3.239217335      | 23.5                |
| 5<br>AAAGACAGCGTACAGCG<br>GGTGGCCCCCGCGA | Jilinxiaoli4 | 0.538626422      | 8.2                 |
|                                          | Dongnong50   | 0.368076675      | 8.5                 |
|                                          | Jilinxiaoli6 | 0.651164001      | 9                   |
|                                          | Suixiaolidou | 0.83919776       | 9.2                 |
|                                          | Tongnong14   | 0.90859146       | 10                  |
|                                          | Lingyin1     | 0.518188249      | 15                  |
|                                          | Lingyin2     | 0.75959113       | 16                  |
|                                          | Jinong18     | 1.329762393      | 17                  |
|                                          | Suinong30    | 1.147259741      | 18                  |
|                                          | Dengke1      | 1.092967721      | 18.5                |
|                                          | Beidou5      | 0.900924298      | 19                  |
|                                          | Dongsheng10  | 1.152216081      | 19.5                |
|                                          | Heihe36      | 1.200666068      | 20.5                |
|                                          | Jiyu62       | 1.19760371       | 20.6                |
|                                          | Jiunong22    | 1.070145108      | 20.7                |
|                                          | Jidadou3     | 1.331260349      | 21.4                |
|                                          | Jinong41     | 1.775196484      | 21.5                |
|                                          | Jiyu65       | 1.261142771      | 21.6                |
| Huajiang2                                | 1.683326531  | 22               |                     |
| Jiyu72                                   | 1.773246116  | 22.3             |                     |
| Jilin40                                  | 2.471919113  | 22.6             |                     |

**Table S8.** Threshold value of each index.

| Threshold value | Pi       |          |          | Pi               |                    | Fst              |                   |
|-----------------|----------|----------|----------|------------------|--------------------|------------------|-------------------|
|                 | G. soja  | Landrace | Cultivar | Landrace/G. soja | Cultivar /Landrace | G. soja-Landrace | Landrace-Cultivar |
| 1%              | 0.000117 | 0.000044 | 0.000032 | 0.0329           | 0.1667             | 0.3487           | 0.1189            |
| 5%              | 0.000568 | 0.000122 | 0.000081 | 0.081            | 0.3274             | 0.2247           | 0.0833            |

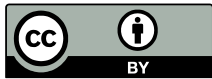

© 2018 by the authors. Licensee MDPI, Basel, Switzerland. This article is an open access article distributed under the terms and conditions of the Creative Commons Attribution (CC BY) license (<http://creativecommons.org/licenses/by/4.0/>).
